# Supplementary material for: Association between Alzheimer’s disease pathogenesis and early demyelination and oligodendrocyte dysfunction
Source: PubMed Central journal article supplement — Neural Regen Res. 2018 May;13(5):908–14. doi: 10.4103/1673-5374.232486 (PMC5998637; doi:10.4103/1673-5374.232486), 2018-05
Supplement: NRR-13-908_Suppl1.pdf [file NRR-13-908_Suppl1.pdf]

**Open peer review report 1**

**Reviewer: Ivan Fernandez-Vega, Hospital Universitario Central de Asturias, Pathology, Avenida de Roma, Oviedo, Asturias 33011, SPAIN.**

**Comments to the authors:**

There are some mayor and minor points to go over before accepting this manuscript for publication. Nevertheless, the article is very well developed and suitable for publication after revision.

This manuscript entitled " Early demyelination and oligodendrocyte dysfunction in the APP/PS1 mice of 3-months and 6-months" indicates an involvement of early demyelination and oligodendrocyte dysfunction in the AD pathogenesis.

There are some mayor and minor points to go over before accepting this manuscript for publication:

Mayor points:

- Authors should discuss in a few words some other possible ways of demyelination in AD mice models, such as vasculature degeneration due to amyloid angyopathy.

Minor points:

-There are some typo- and grammatical errors which makes it difficult to read. Control instead of "contral", IHC instead of HIC (page7, line 9), Microtome instead of cryostat, into instead of "in to" ...
